# Supplementary material for: Did saber-tooth kittens grow up musclebound? A study of postnatal limb bone allometry in felids from the Pleistocene of Rancho La Brea
Source: PLoS One. 2017 Sep 27;12(9):e0183175. doi: 10.1371/journal.pone.0183175 (PMC5617143; doi:10.1371/journal.pone.0183175)
Supplement: S2 Table — (XLSX) [file pone.0183175.s002.xlsx]

## Sheet: Humeri
LENGTH	CIRCUMF.	LN(circumf)	LN(length)	LN (Circufm)		LENGTH	WIDTH	DEPTH		LENGTH	AREA	LN(area)	LN(length)	LN(area)
290	133	4.89035	5.66988	4.89035		290	33	53		290	1749	7.4668	5.66988	7.4668
250	124	4.82028	5.52146	4.82028		250	31	49		250	1519	7.32581	5.52146	7.32581
285	140	4.94164	5.65249	4.94164		285	32	53		285	1696	7.43603	5.65249	7.43603
230	113	4.72739	5.43808	4.72739		230	26	39		230	1014	6.92166	5.43808	6.92166
280	138	4.92725	5.63479	4.92725		280	36	50		280	1800	7.49554	5.63479	7.49554
260	135	4.90527	5.56068	4.90527		260	33	46		260	1518	7.32515	5.56068	7.32515
315	150	5.01064	5.75257	5.01064		315	36	59		315	2124	7.66106	5.75257	7.66106
110	73	4.29046	4.70048	4.29046		110	20	22		110	440	6.08677	4.70048	6.08677
240	105	4.65396	5.48064	4.65396		240	27	38		240	1026	6.93342	5.48064	6.93342
310	141	4.94876	5.73657	4.94876		310	35	53		310	1855	7.52564	5.73657	7.52564
290	150	5.01064	5.66988	5.01064		290	37	54		290	1998	7.5999	5.66988	7.5999
300	135	4.90527	5.70378	4.90527		300	35	55		300	1925	7.56268	5.70378	7.56268
250	135	4.90527	5.52146	4.90527		250	31	48		250	1488	7.30519	5.52146	7.30519
245	100	4.60517	5.50126	4.60517		245	26	37		245	962	6.86901	5.50126	6.86901

## Sheet: Radius
LENGTH	CIRCUMF	LN(circumf)	LN(Length)	LN(Circumf)		LENGTH	AREA	LN(area)	LN(length)	LN (area)
220	70	4.2485	5.39363	4.2485		220	22.9148	3.13178	5.39363	3.13178
310	105	4.65396	5.73657	4.65396		310	26.6978	3.28458	5.73657	3.28458
240	80	4.38203	5.48064	4.38203		240	24.0163	3.17873	5.48064	3.17873
255	95	4.55388	5.54126	4.55388		255	25.2342	3.2282	5.54126	3.2282
245	80	4.38203	5.50126	4.38203		245	24.1067	3.18249	5.50126	3.18249
320	115	4.74493	5.76832	4.74493		320	27.3703	3.30946	5.76832	3.30946
230	80	4.38203	5.43808	4.38203		230	23.8298	3.17094	5.43808	3.17094
230	70	4.2485	5.43808	4.2485		230	23.1037	3.13999	5.43808	3.13999

## Sheet: Femur
LENGTH	CIRCUMF.	ln (circumf)	LN(length)	LN(circumf)		LENGTH	AREA	LN(area)	LN(length)	LN (area)
330	113	4.72739	5.79909	4.72739		330	1188	7.08003	5.79909	7.08003
380	130	4.86753	5.94017	4.86753		380	1628	7.39511	5.94017	7.39511
335	105	4.65396	5.81413	4.65396		335	1088	6.9921	5.81413	6.9921
270	100	4.60517	5.59842	4.60517		270	960	6.86693	5.59842	6.86693
285	100	4.60517	5.65249	4.60517		285	961	6.86797	5.65249	6.86797
360	125	4.82831	5.8861	4.82831		360	1480	7.2998	5.8861	7.2998
235	100	4.60517	5.45959	4.60517		235	928	6.83303	5.45959	6.83303
260	104	4.64439	5.56068	4.64439		260	930	6.83518	5.56068	6.83518
									0.718603

## Sheet: Tibia
CAT. #	LENGTH	CIRCUMF	MIdshaftDep	MIdshaftW		Ln (circumf)	Ln (length)	AREA	Ln (area	LN(length)
LACMHC15339	23	9.5	3.1	2.8		2.25129	3.13549	8.68	2.16102	3.13549
7242	27.4	12	3.9	3.2		2.48491	3.31054	12.48	2.52413	3.31054
7243	26.5	10.7	3.6	3.1		2.37024	3.27714	11.16	2.41234	3.27714
7244	32	12.8	4.6	3.6		2.54945	3.46574	16.56	2.80699	3.46574
7246	32.6	13.2	3.9	3.8		2.58022	3.48431	14.82	2.69598	3.48431
15346	27.5	9.8	3.2	2.7		2.28238	3.31419	8.64	2.1564	3.31419
15343	25	9.8	3	2.5		2.28238	3.21888	7.5	2.0149	3.21888
7256	31	11.3	3.7	3.4		2.4248	3.43399	12.58	2.53211	3.43399
7254	27.8	12	4	3.3		2.48491	3.32504	13.2	2.58022	3.32504
7258	28	10.2	3.6	2.9		2.32239	3.3322	10.44	2.34564	3.3322
7260	25	10	3.1	2.8		2.30259	3.21888	8.68	2.16102	3.21888
15354	28	11.4	3.7	3.4		2.43361	3.3322	12.58	2.53211	3.3322
7216	29	12	3.8	3.2		2.48491	3.3673	12.16	2.49815	3.3673
7214	29.5	13	3.9	3.4		2.56495	3.38439	13.26	2.58475	3.38439
7224	27.5	11	3.8	3.1		2.3979	3.31419	11.78	2.4664	3.31419
15355	27.5	10.7	3.4	2.9		2.37024	3.31419	9.86	2.28849	3.31419
7264	28.5	11.5	3.7	3		2.44235	3.3499	11.1	2.40695	3.3499
44591	17.5	7.5	2.2	2.5		2.0149	2.8622	5.5	1.70475	2.8622
53392	12	9.5	2.8	3		2.25129	2.48491	8.4	2.12823	2.48491
